# Supplementary material for: Characterization of a New Trioxilin and a Sulfoquinovosyl Diacylglycerol with Anti-Inflammatory Properties from the Dinoflagellate Oxyrrhis marina
Source: Mar Drugs. 2017 Feb 27;15(3):57. doi: 10.3390/md15030057 (PMC5367014; doi:10.3390/md15030057)
Supplement: Supplementary file 1 [file marinedrugs-15-00057-s001.pdf]

## Supplementary Materials

# Characterization of a new trioxilin and a sulfoquinovosyl diacylglycerol with anti-inflammatory properties from the dinoflagellate *Oxyrrhis marina*

Eun Young Yoon, A Reum Yang, Jaeyeon Park, Seung Joo Moon, Eun Ju Jeong and Jung-Rae Rho

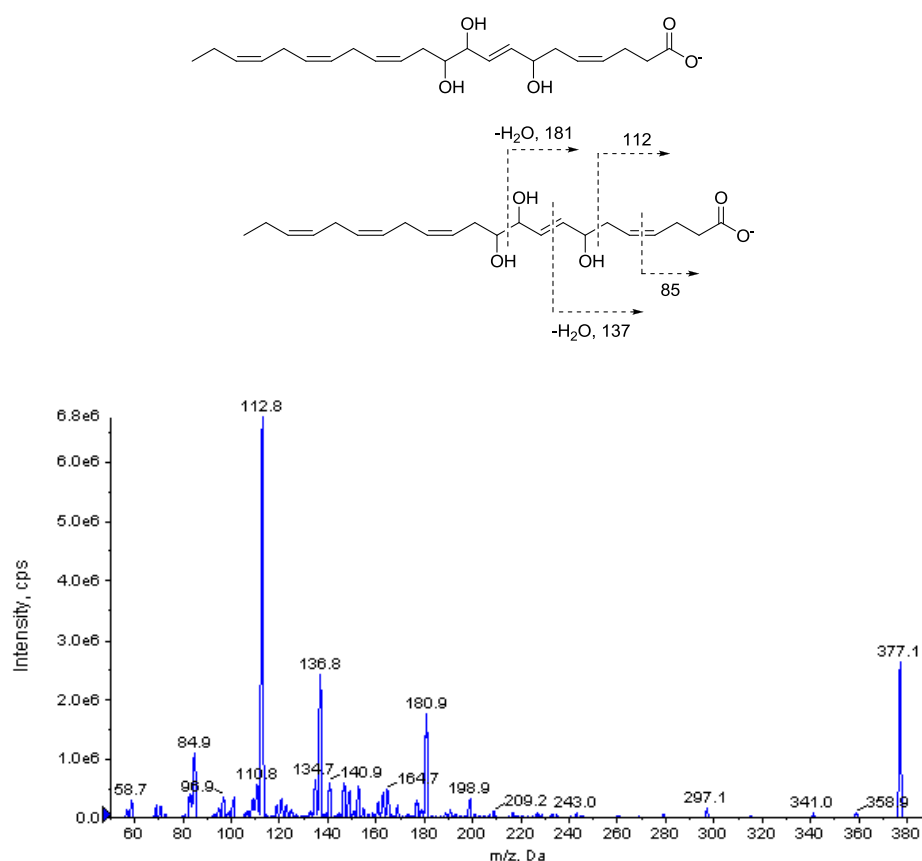

Figure S1. MS/MS fragmentation of compound 1.

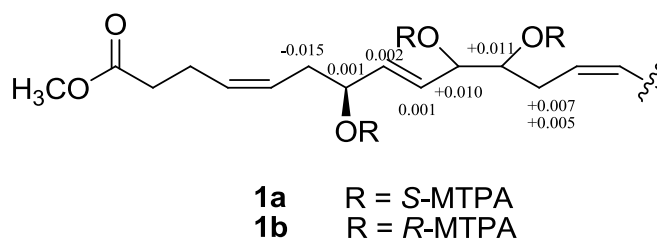

Figure S2. Differences in chemical shifts of key protons of S-MTPA ester (1a) and R-MTPA ester (1b).

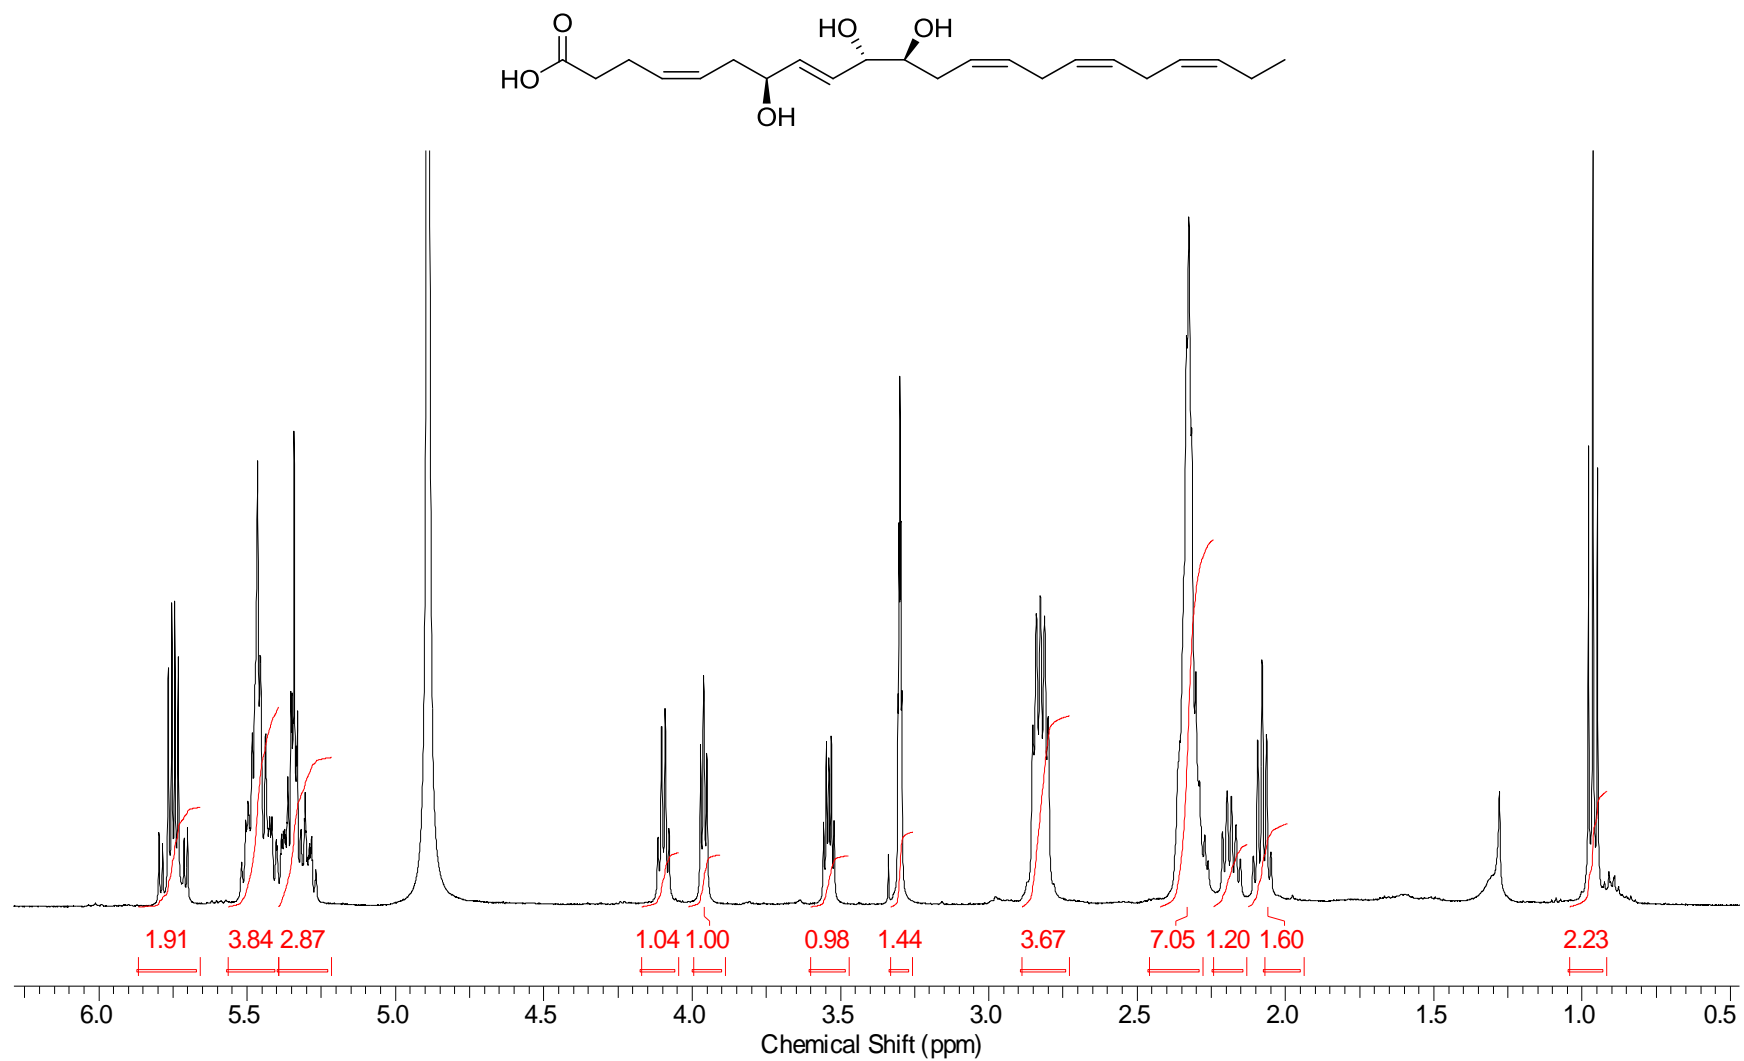

**Figure S3.** <sup>1</sup>H NMR spectrum of compound 1 at 500 MHz.

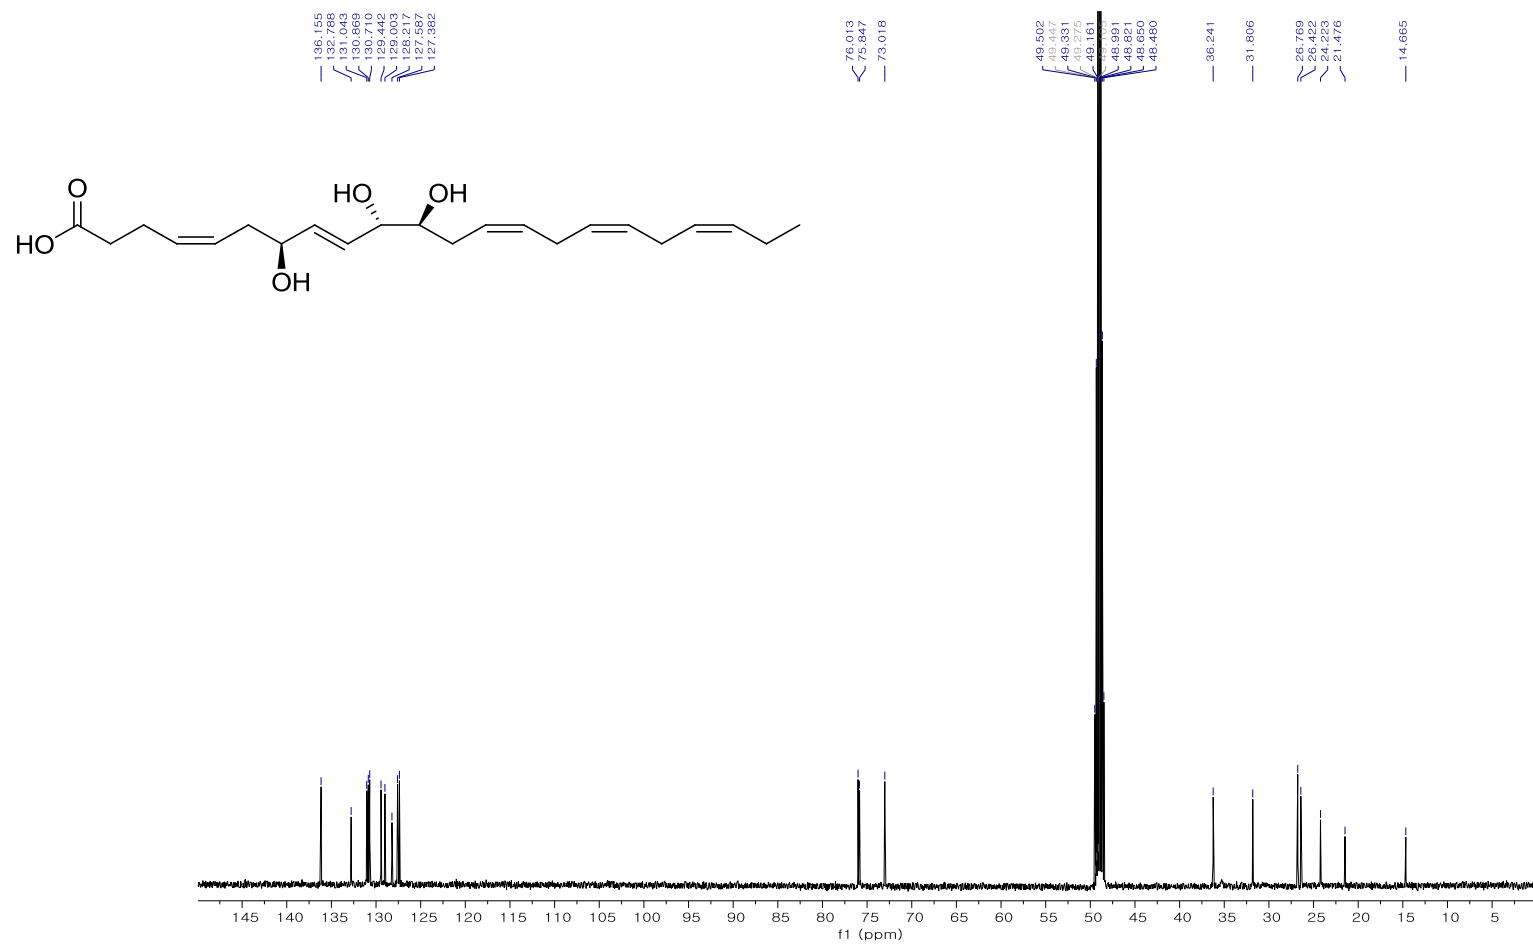

Figure S4. <sup>13</sup>C NMR spectrum of compound 1 at 125 MHz.

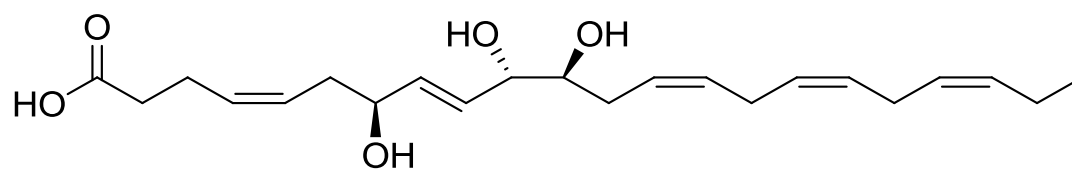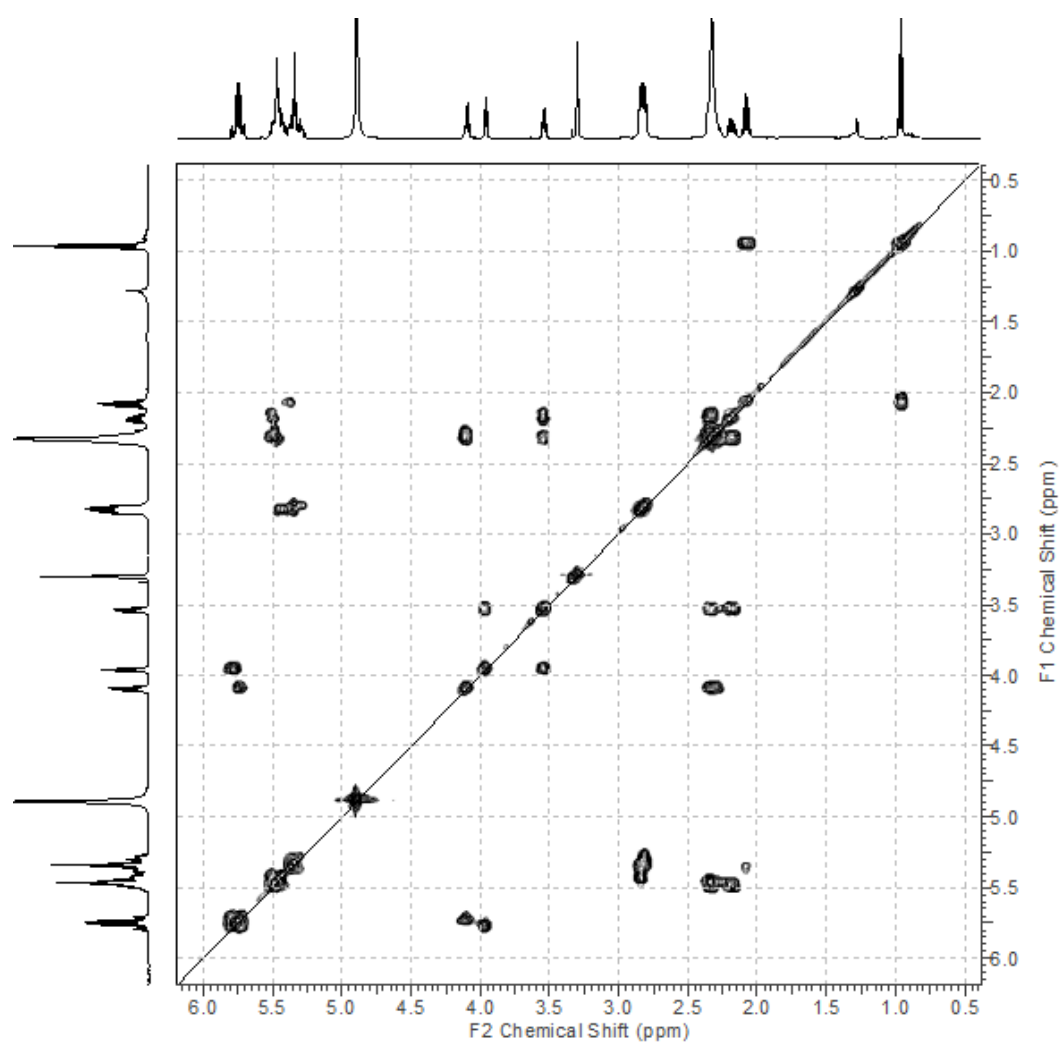

Figure S5. COSY NMR spectrum of compound 1 at 500 MHz.

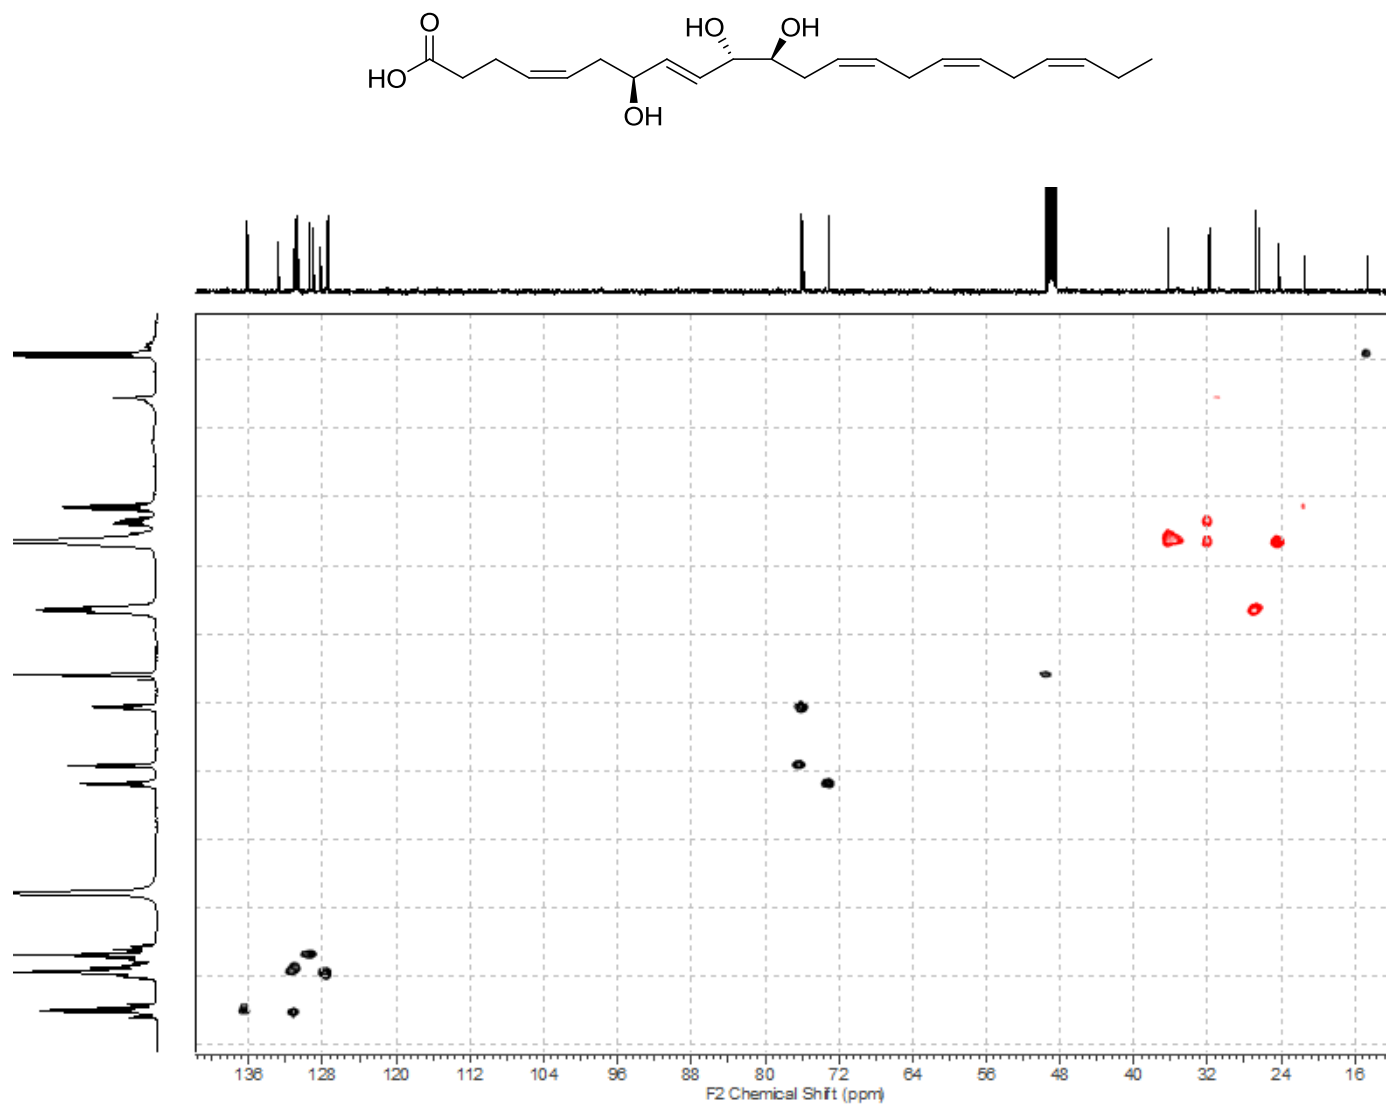

Figure S6. HSQC NMR spectrum of compound 1 at 500 MHz. (Black: CH, CH<sub>3</sub>; Red: CH<sub>2</sub>)

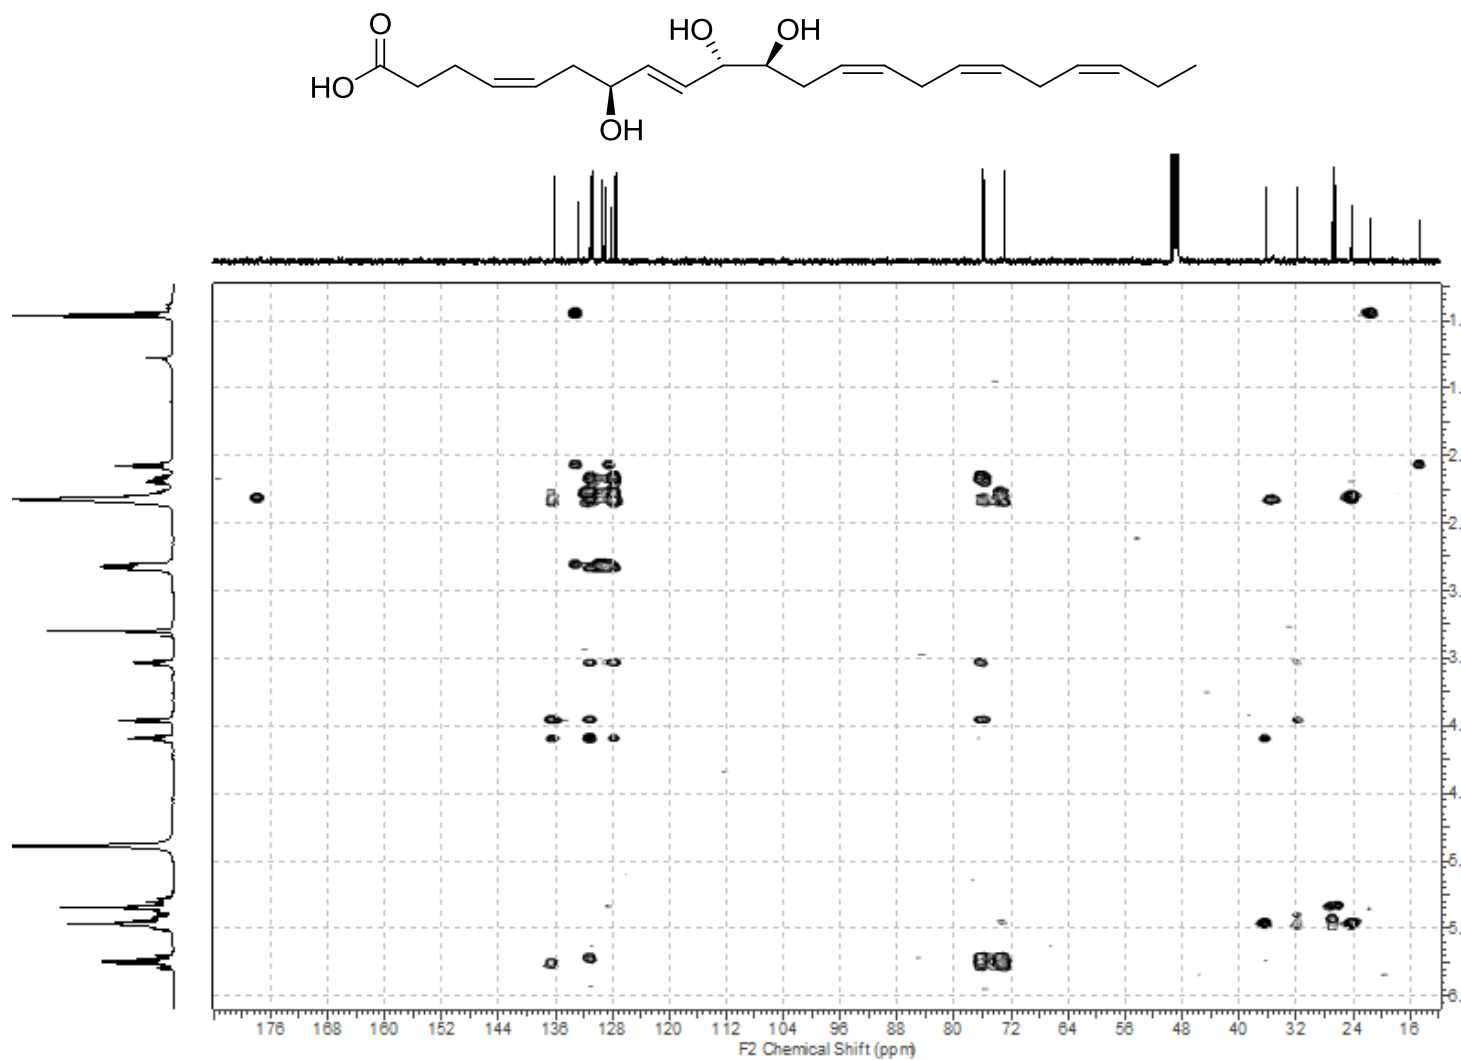

Figure S7. HMBC NMR spectrum of compound 1 at 500 MHz.

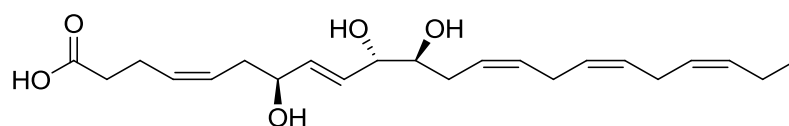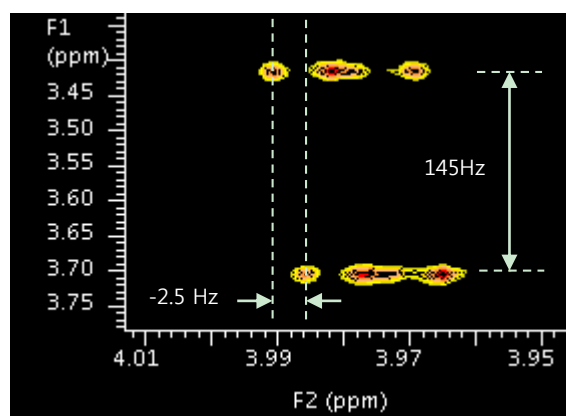

$$^2J_{\text{H}_{10}\text{C}_{11}} = -2.5 \text{ Hz}$$

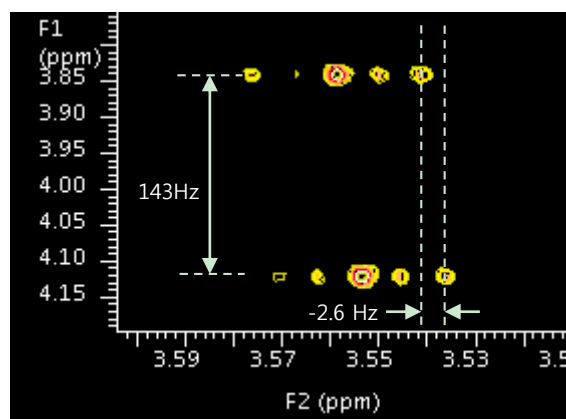

$$^2J_{\text{H}_{11}\text{C}_{10}} = -2.6 \text{ Hz}$$

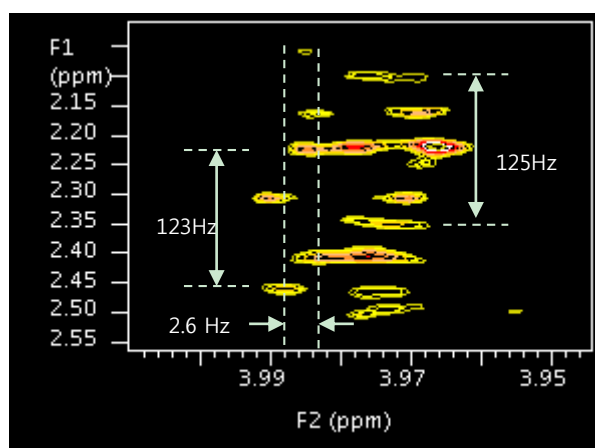

$$^3J_{\text{H}_{10}\text{C}_{12}} = +2.6 \text{ Hz}$$

Figure S8. Key HETLOC NMR cross peaks of compound **1** at 500 MHz.

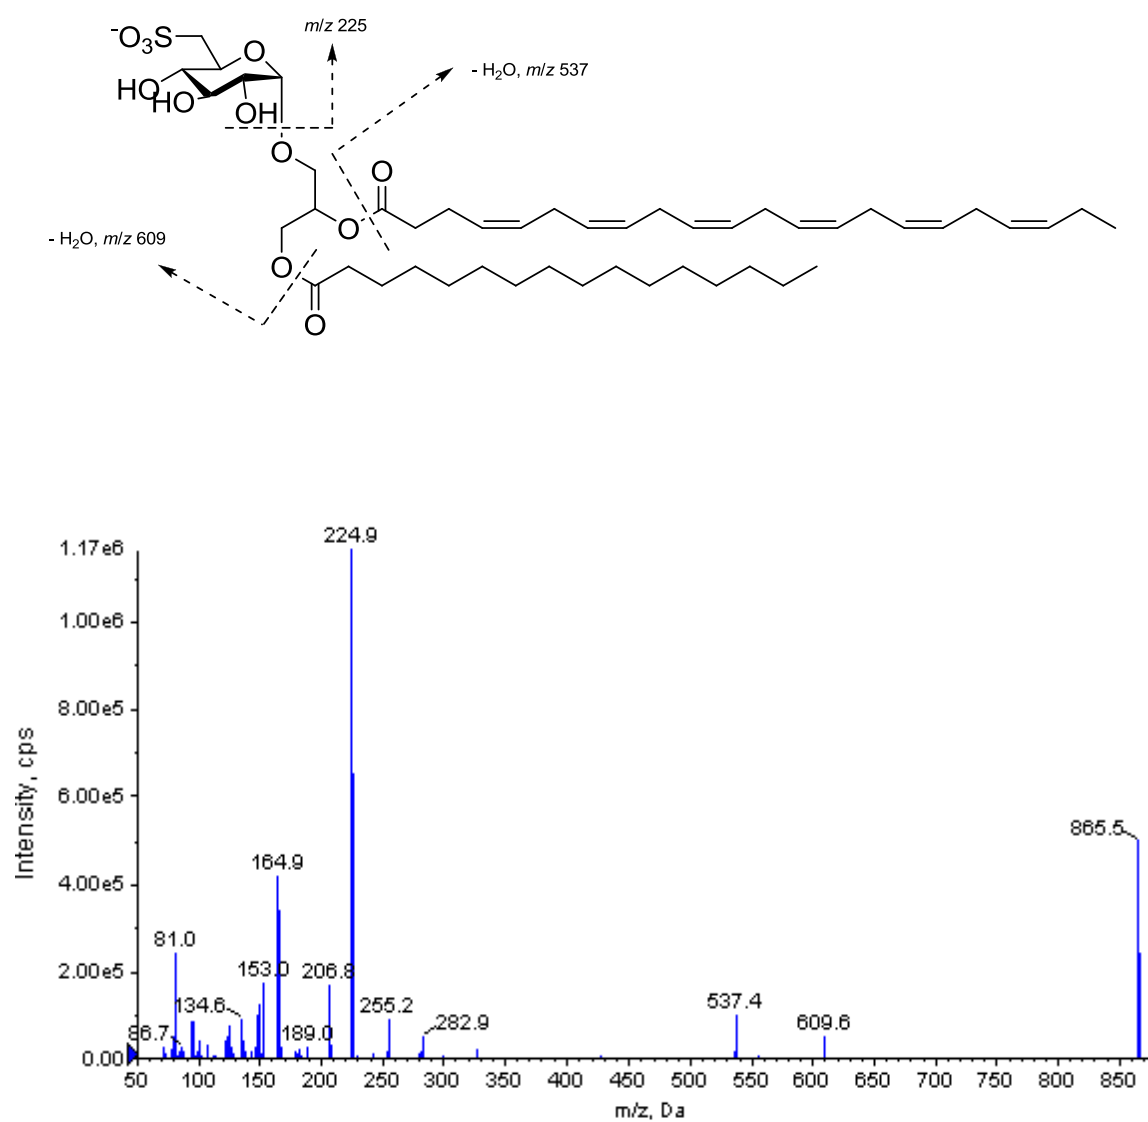

**Figure S9.** MS/MS fragmentation of compound 2.

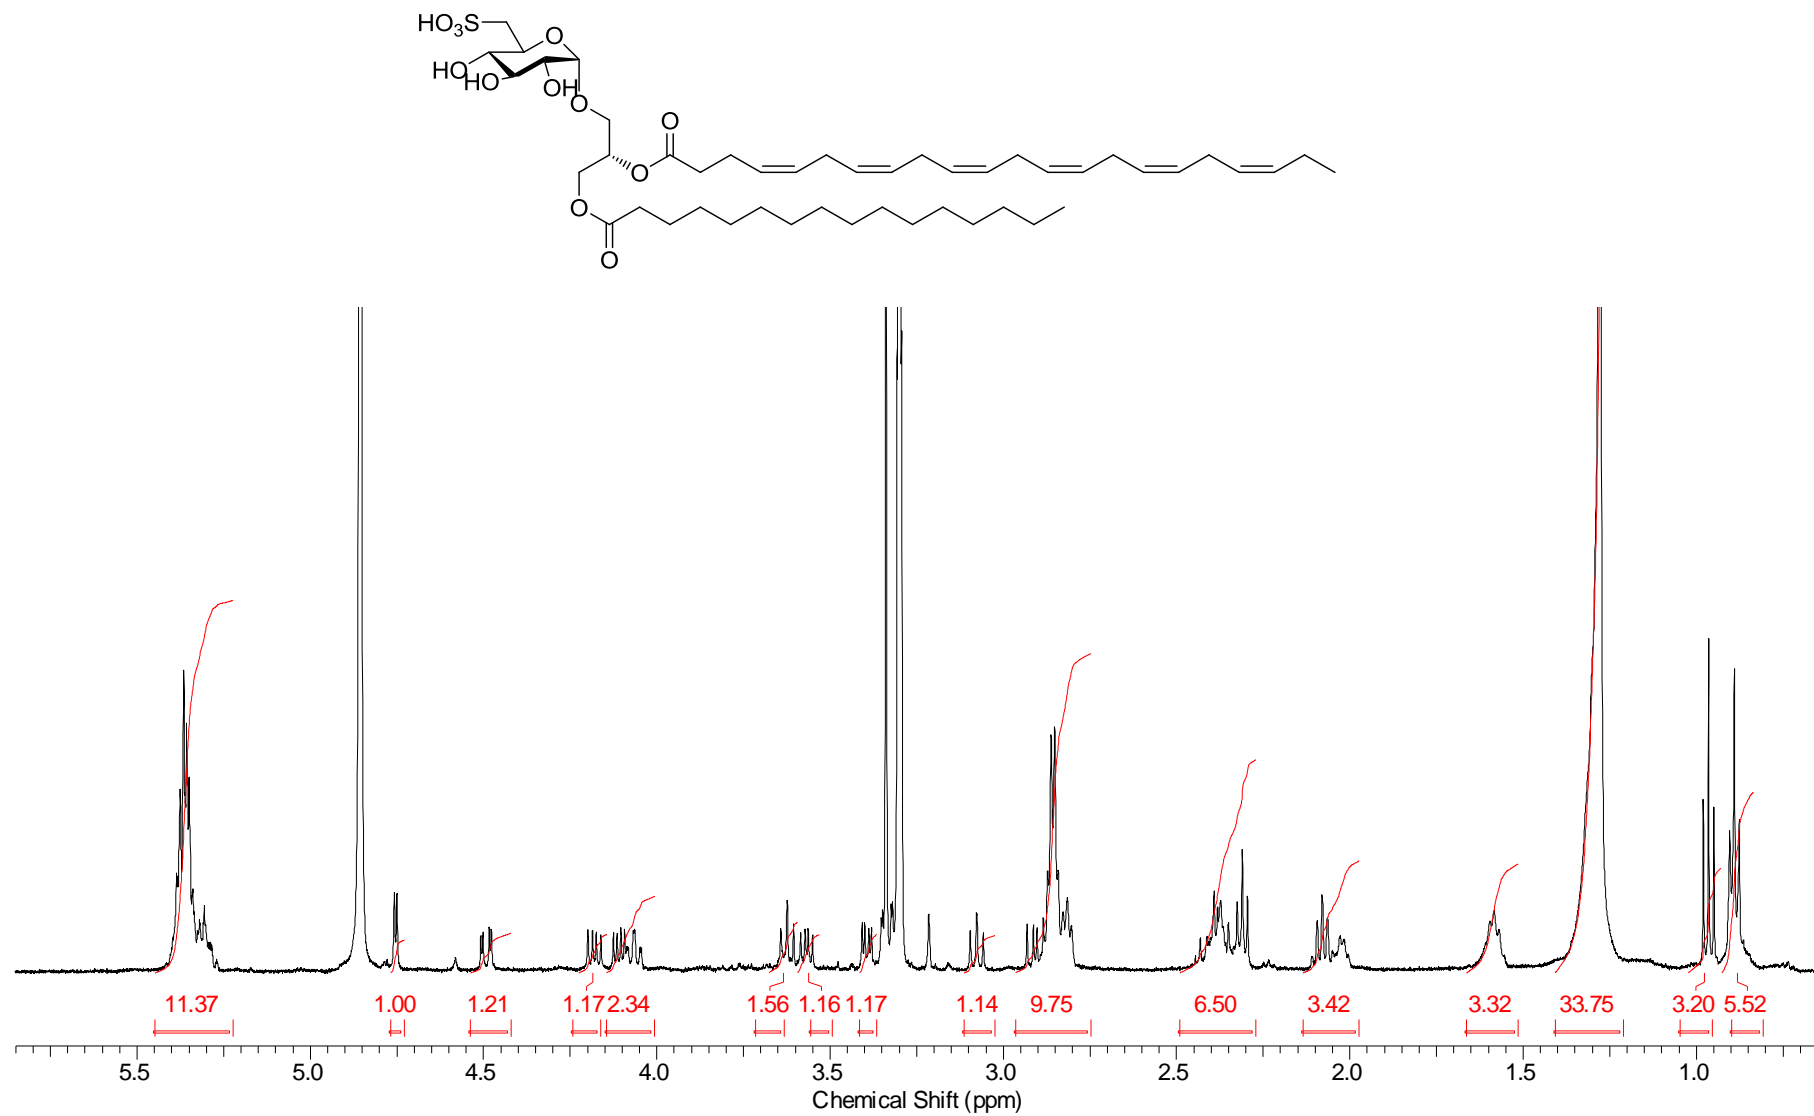

**Figure S10.** <sup>1</sup>H NMR spectrum of compound 2 at 500 MHz.

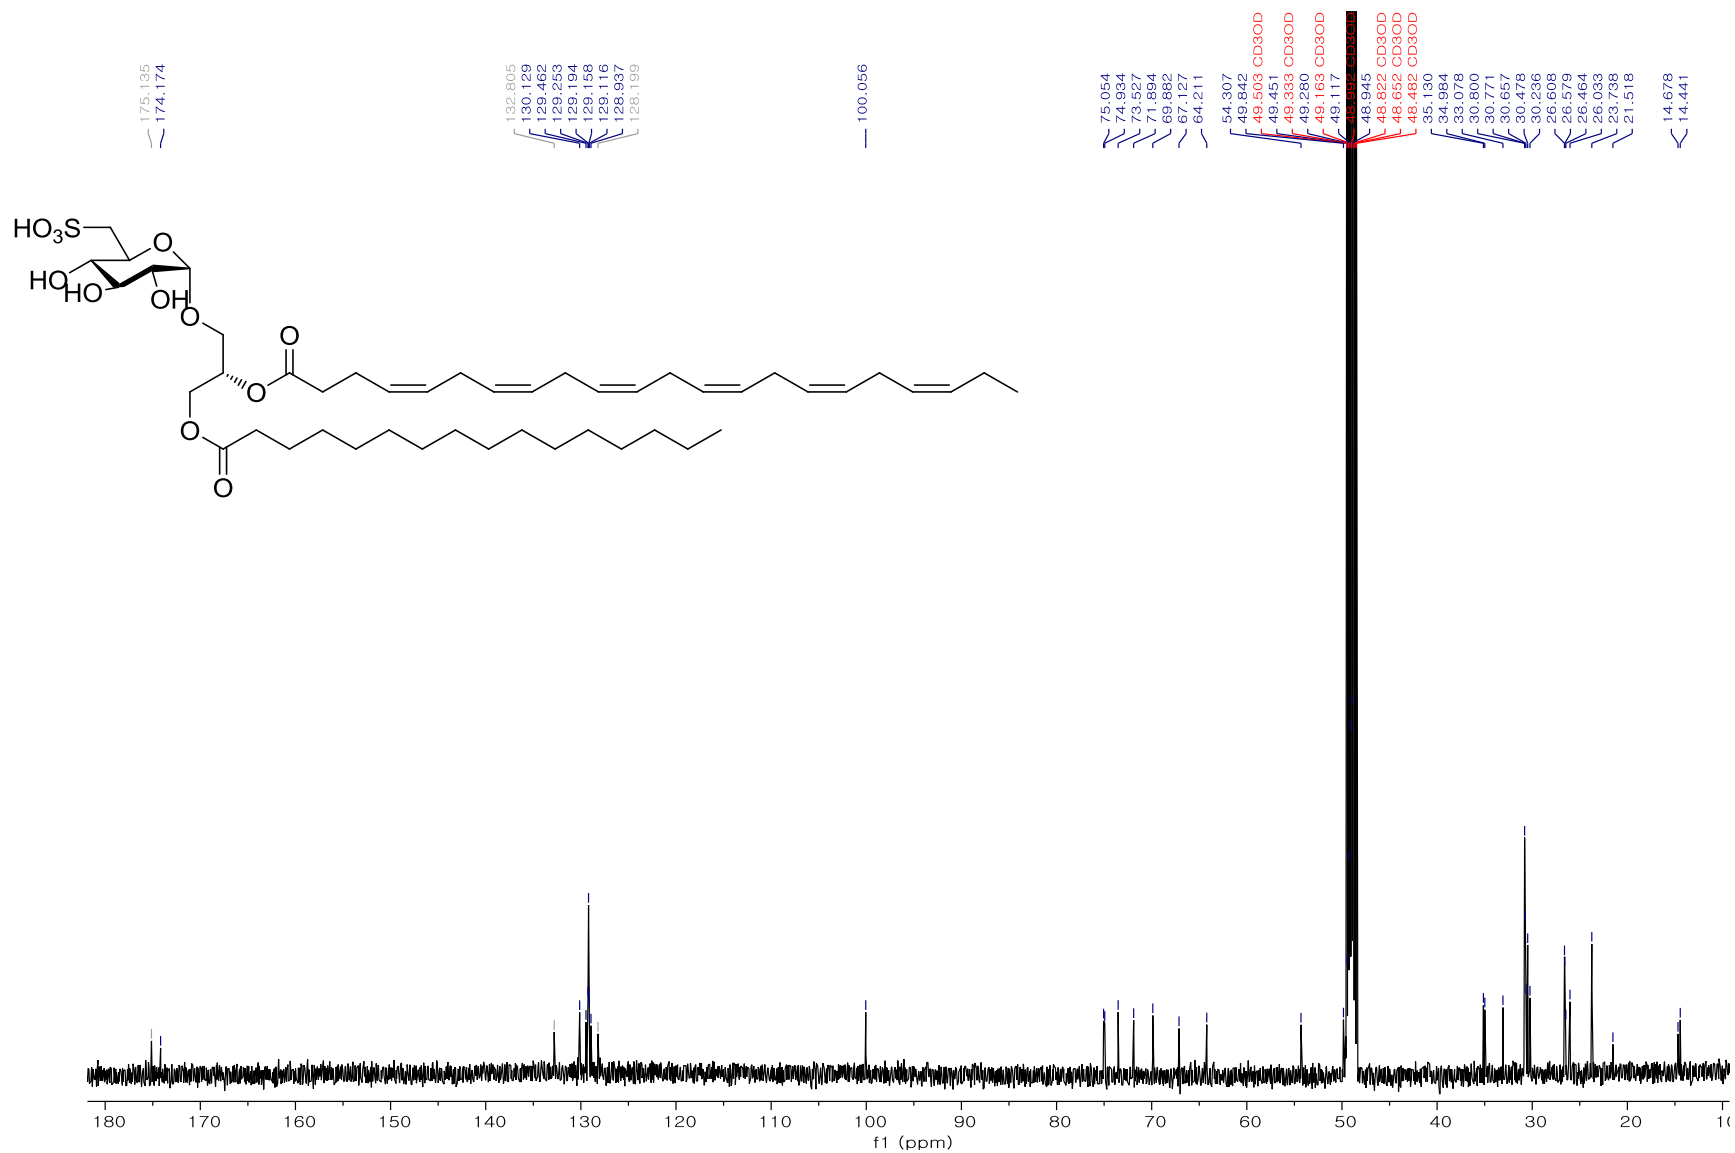Figure S11. <sup>13</sup>C NMR spectrum of compound 2 at 125 MHz.

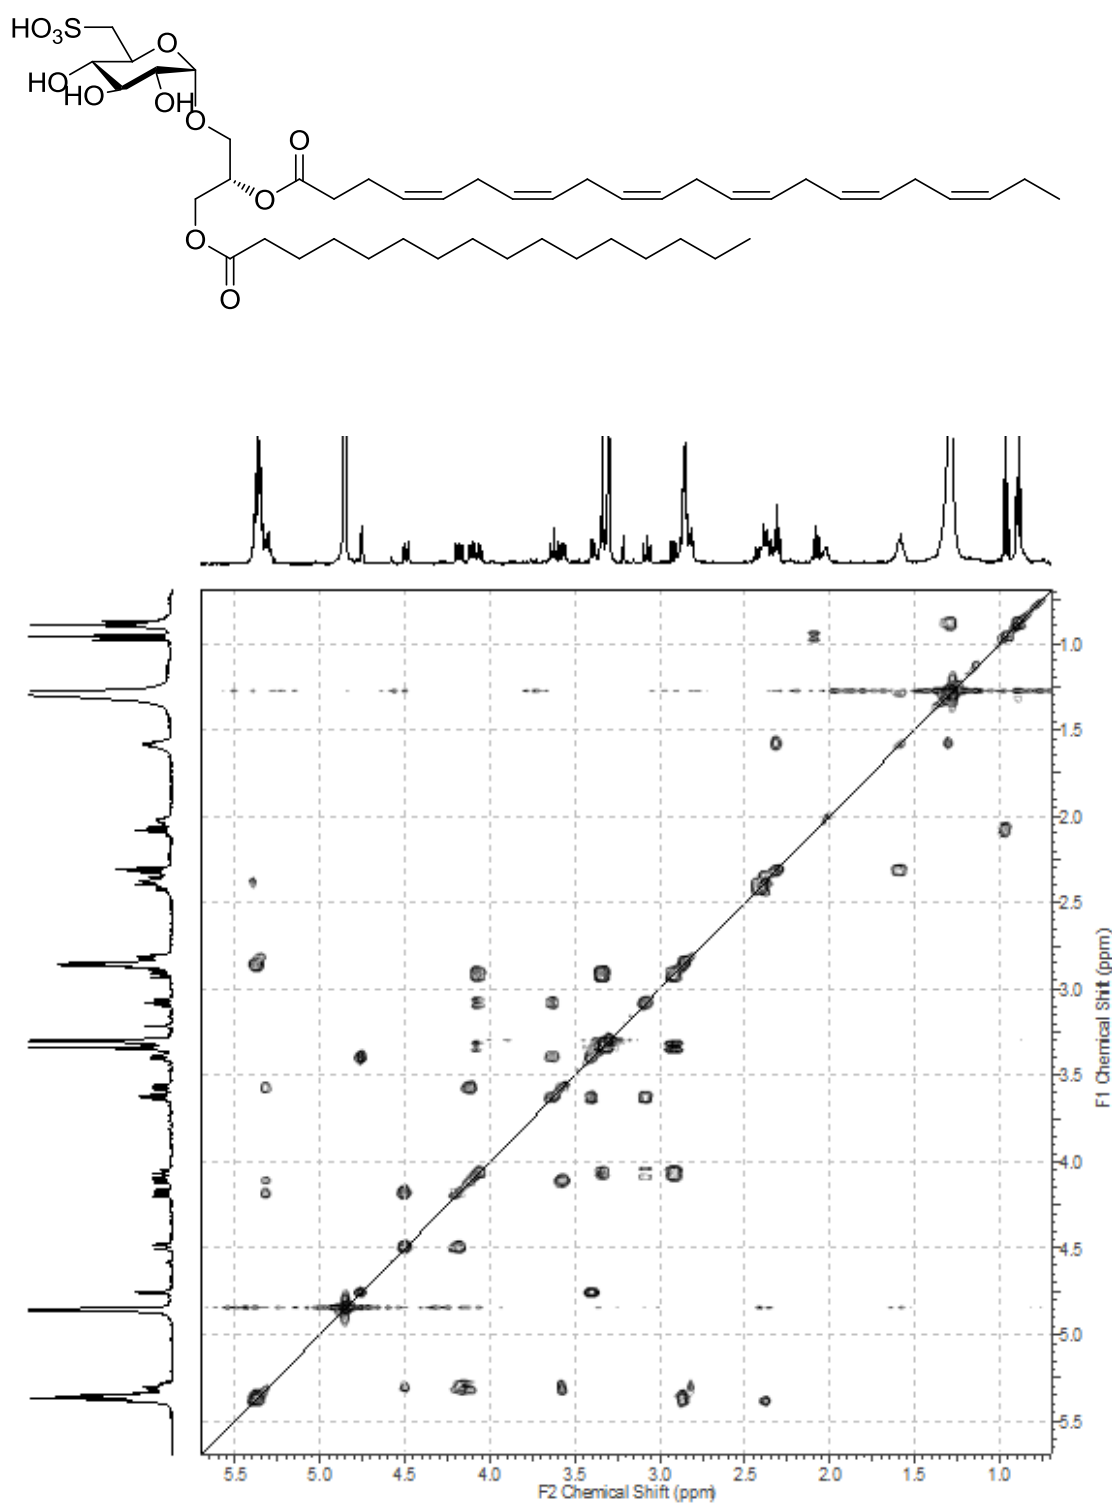

Figure S12. COSY NMR spectrum of compound 2 at 500 MHz.

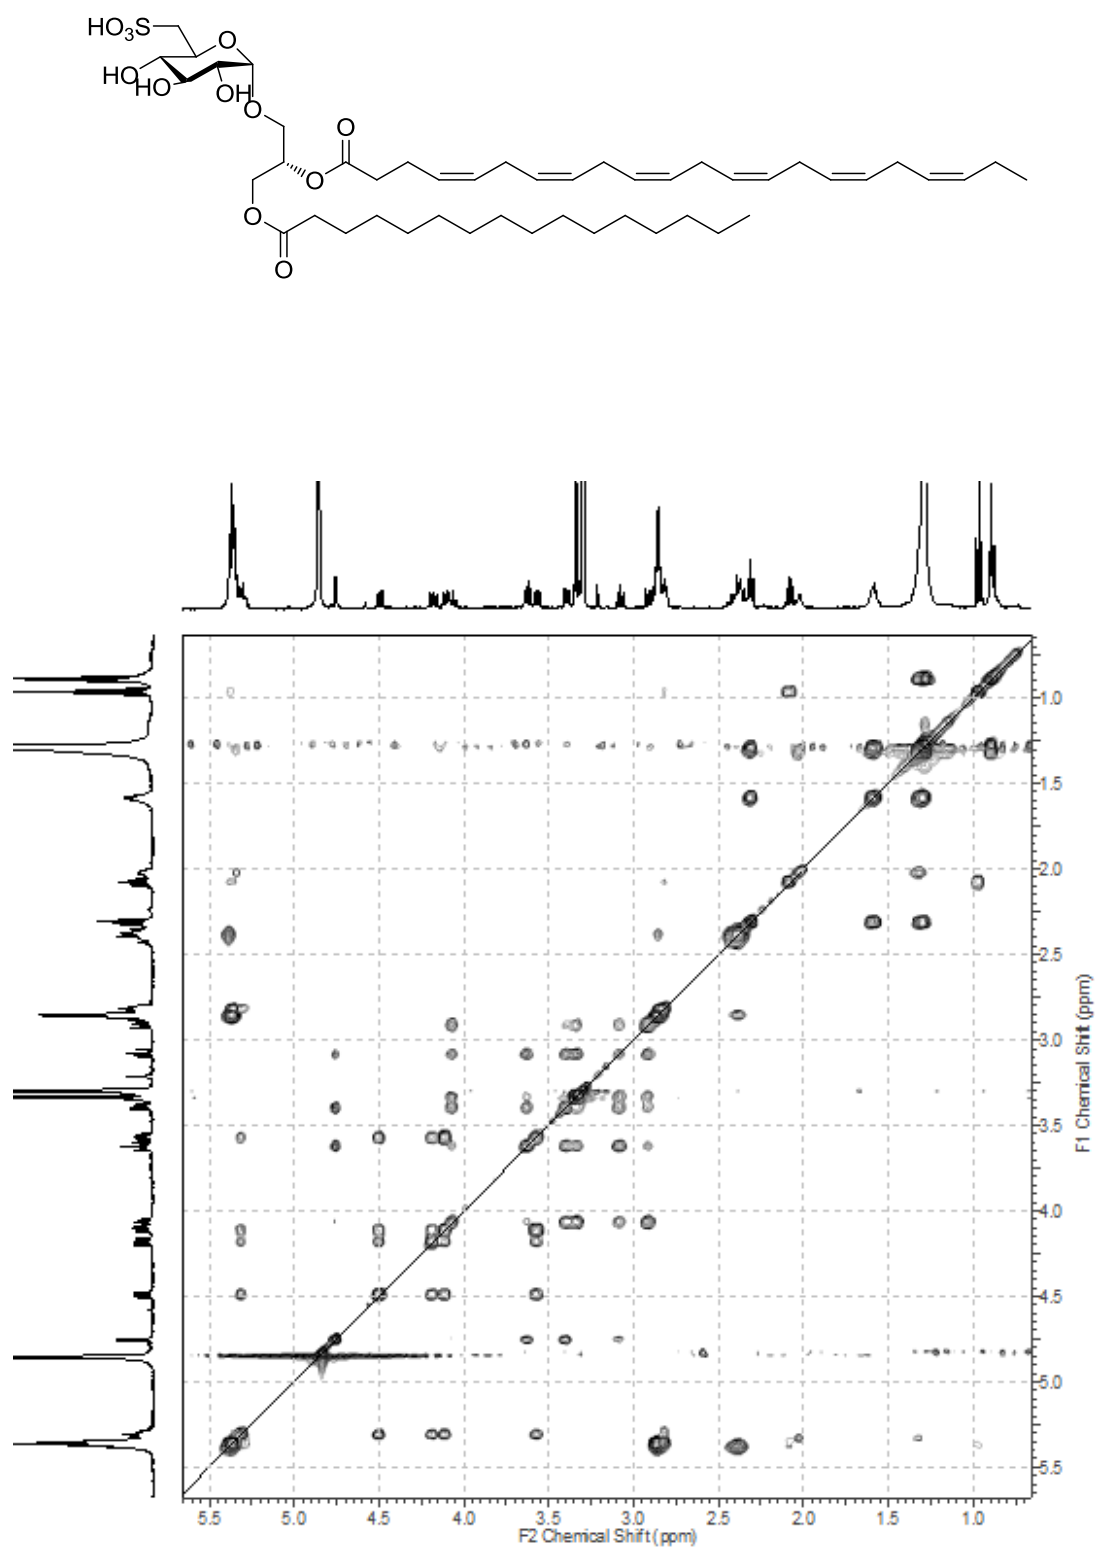

Figure S13. TOCSY NMR spectrum of compound 2 at 500 MHz.



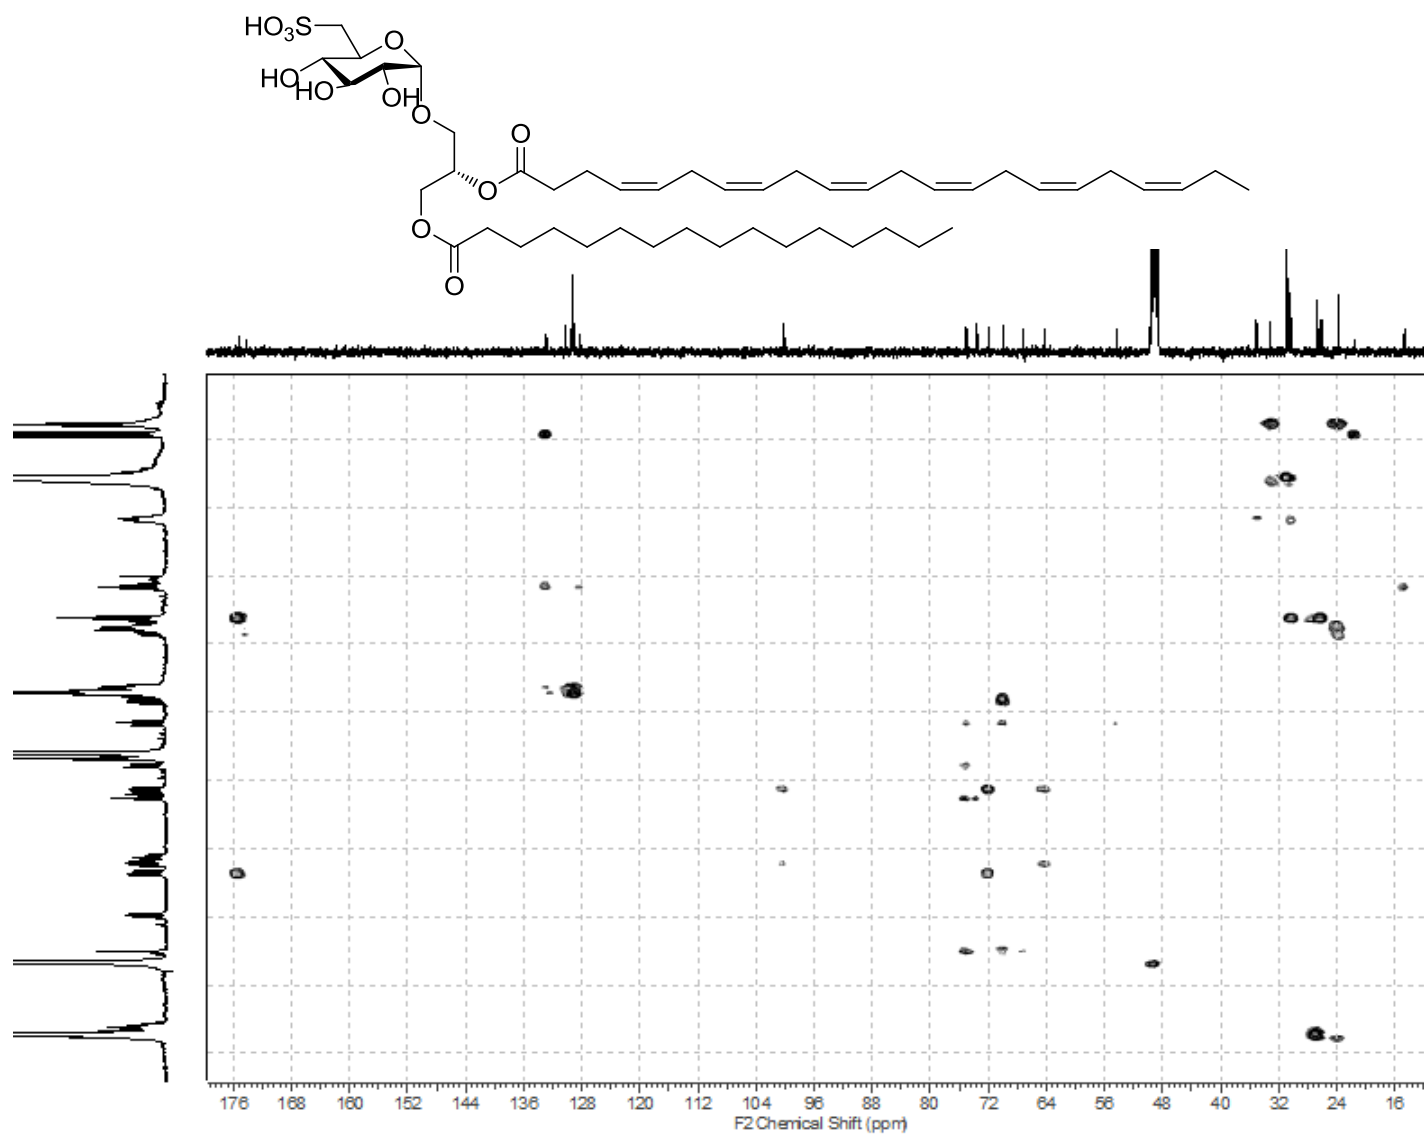

**Figure S15.** HMBC NMR spectrum of compound 2 at 500 MHz.

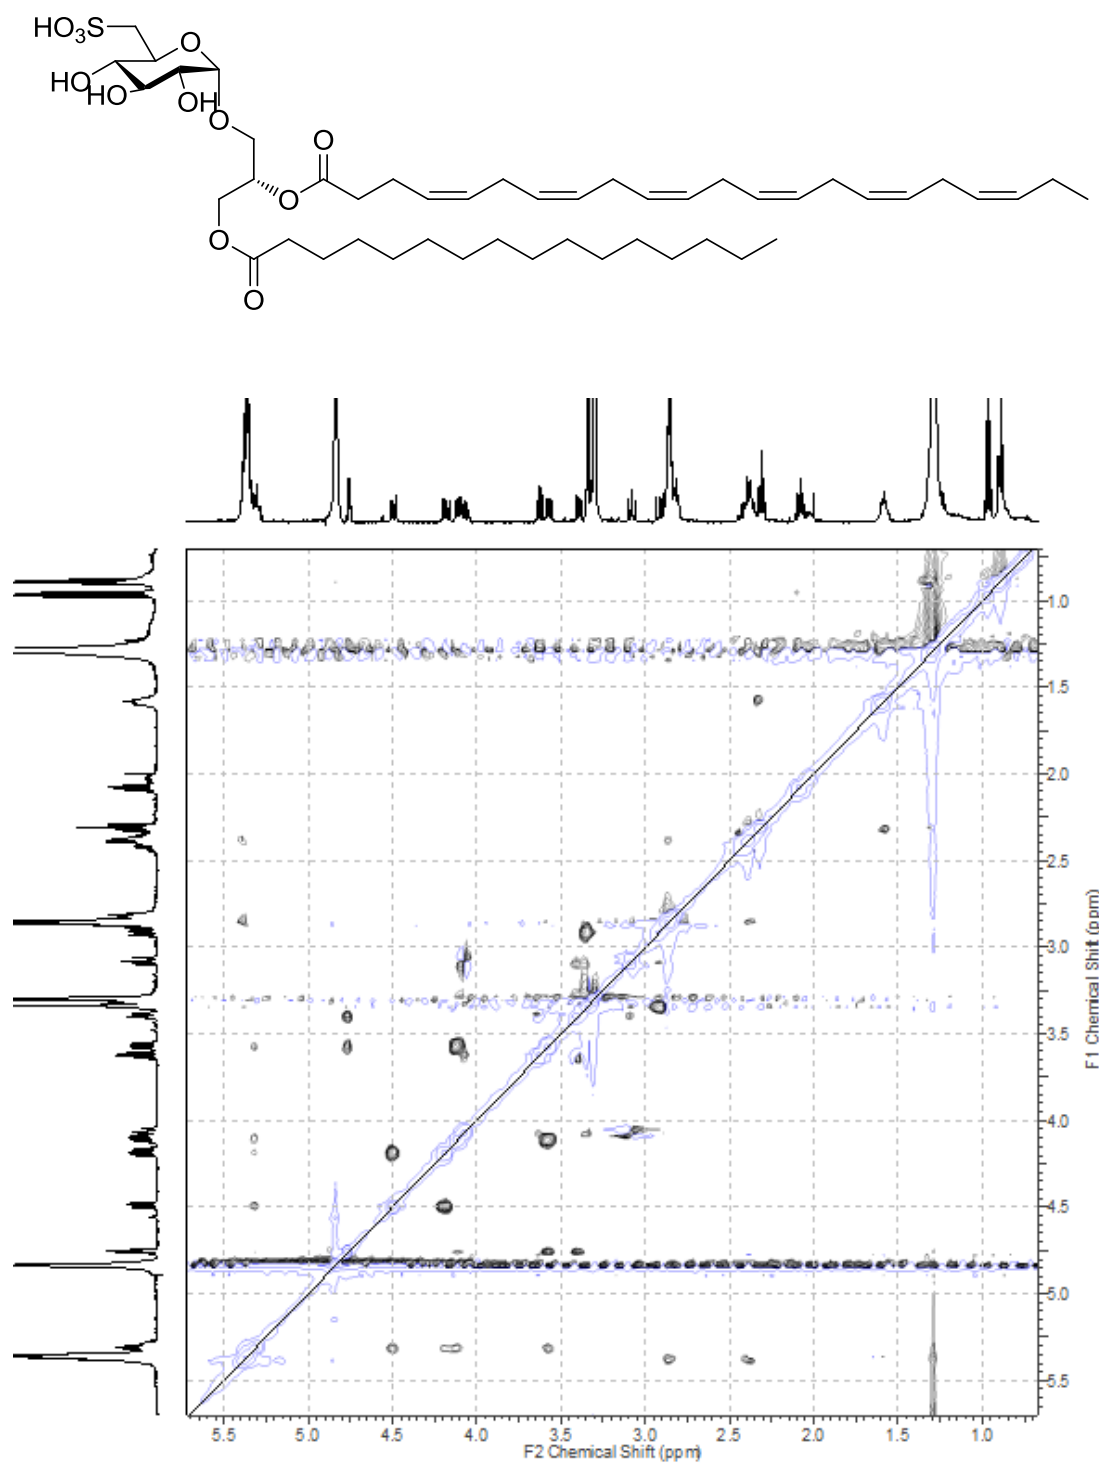

Figure S16. ROESY NMR spectrum of compound 2 at 500 MHz.
